# Supplementary material for: Changes of Intestinal Microflora in Colorectal Cancer Patients after Surgical Resection and Chemotherapy
Source: Hindawi journal article supplement (doi:10.1155/2022/1940846), 2022-02-24
Supplement: f1 [file 1940846.f1.doc]

**Table S1 pretreatment and quality control of sequencing data**

| Sample Name | Raw PE | Clean PE | Raw Tags | Clean Tags | Effective Tags | Effective Ratio (%) |
| --- | --- | --- | --- | --- | --- | --- |
| CON_1 | 102220 | 101902 | 96645 | 94774 | 80584 | 78.83 |
| CON_2 | 112283 | 112006 | 106784 | 104846 | 82174 | 73.18 |
| CON_3 | 108493 | 108181 | 102927 | 101667 | 87146 | 80.32 |
| CON_4 | 102185 | 101910 | 97170 | 95131 | 82810 | 81.04 |
| CON_5 | 106990 | 106697 | 101668 | 99903 | 79626 | 74.42 |
| CC_1 | 109444 | 109334 | 105429 | 103745 | 90122 | 82.35 |
| CC_2 | 100932 | 100849 | 95516 | 93934 | 84855 | 84.07 |
| CC_3 | 102947 | 102834 | 96957 | 94136 | 79916 | 77.63 |
| CCT0_1 | 110826 | 110707 | 105927 | 104450 | 91096 | 82.20 |
| CCT0_2 | 107623 | 107514 | 103258 | 101708 | 91880 | 85.37 |
| CCT1_1 | 105741 | 105619 | 100867 | 98644 | 87715 | 82.95 |
| CCT1_2 | 106923 | 106812 | 102655 | 99675 | 88118 | 82.41 |
| RC_1 | 112501 | 112394 | 107584 | 106237 | 97512 | 86.68 |
| RC_2 | 111666 | 111564 | 105591 | 103482 | 82859 | 74.20 |
| RCT0_1 | 104777 | 104681 | 99918 | 98869 | 89226 | 85.16 |
| RCT1_1 | 113497 | 113391 | 108963 | 106065 | 93527 | 82.40 |
| RCT1_2 | 103927 | 103819 | 99812 | 97252 | 85874 | 82.63 |
